# Supplementary material for: Functional neuronal circuitry and oscillatory dynamics in human brain organoids
Source: PubMed Central journal article supplement (PMC9338020; doi:10.1038/s41467-022-32115-4), 2022-07-29
Supplement: 41467_2022_32115_MOESM3_ESM.pdf [file 41467_2022_32115_MOESM3_ESM.pdf]

## **Description of Additional Supplementary Files**

**File Name: Supplementary Data 1.**

**Description:** Organoid age when the onset of synchronized neuronal population bursts occur are listed in a table for six organoids.
